# Supplementary material
Source: publisher figshare collection journal article supplement (https://acs.figshare.com/ndownloader/files/24688335)
Supplement: Supplementary file 1 [file 24688335]

## Supporting Information

### **Nanometer-Thick Films of Aligned ZnO Nanowires Sensitized with Au Nanoparticles for Few-ppb Level Acetylene Detection**

Jiansong Miao<sup>a</sup>, Jerry Y.S. Lin<sup>a,\*</sup>

<sup>a</sup> School for Engineering of Matter, Transport and Energy, Arizona State University, Tempe, AZ, 85287, USA

Corresponding author email: [Jerry.Lin@asu.edu](mailto:Jerry.Lin@asu.edu)

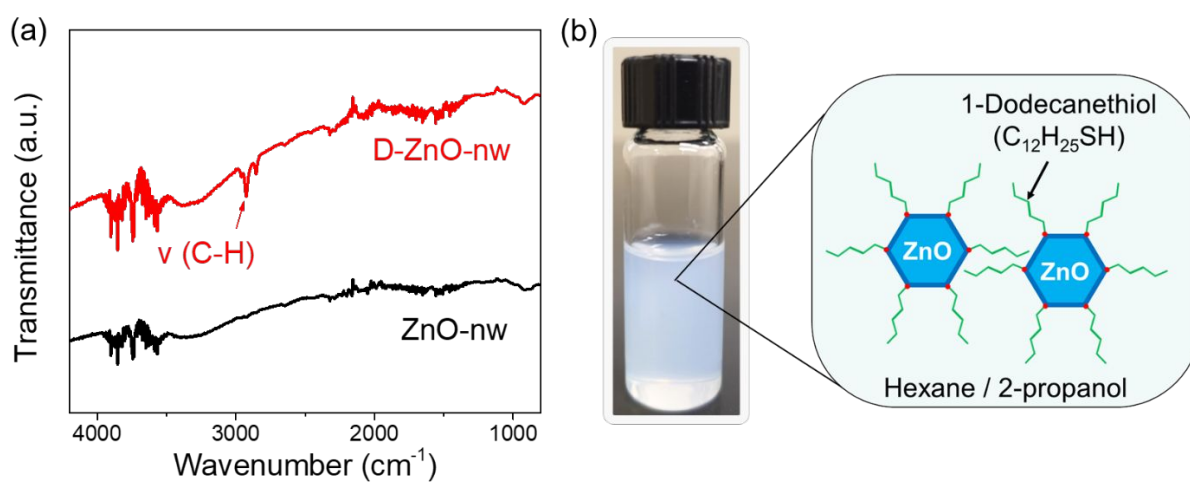

**Figure S 1** (a) FTIR spectra of pristine and functionalized ZnO nanowire. (b) Colloidal solution of ZnO nanowire in hexane.

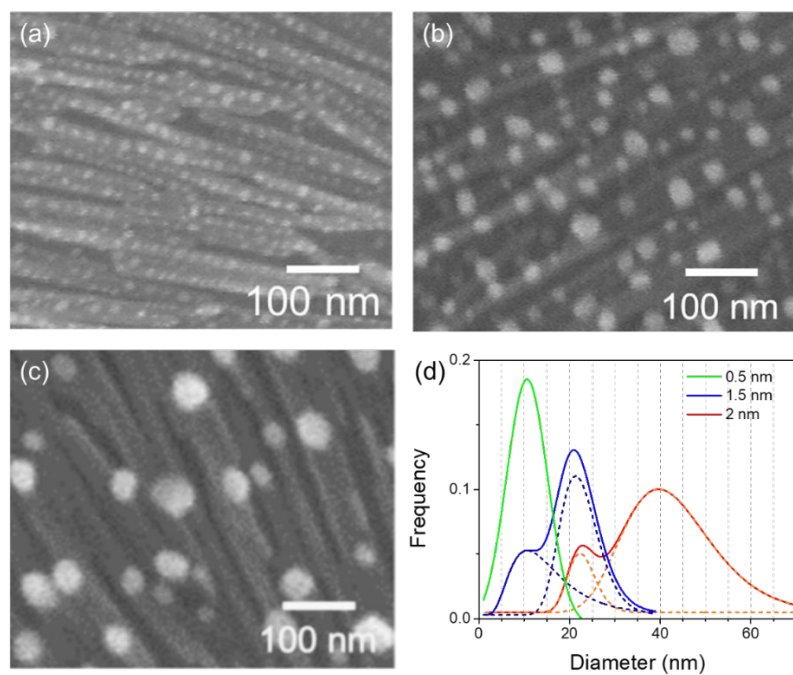

**Figure S 2** (a-c) SEM of annealed Au@ZnO-LF samples with initial Au loading of 0.5 nm (13 wt%), 1.5 nm (39 wt%), and 2 nm (52 wt%). Particle size distributions of 0.5nm-2nm Au@ZnO-LF based on SEM images

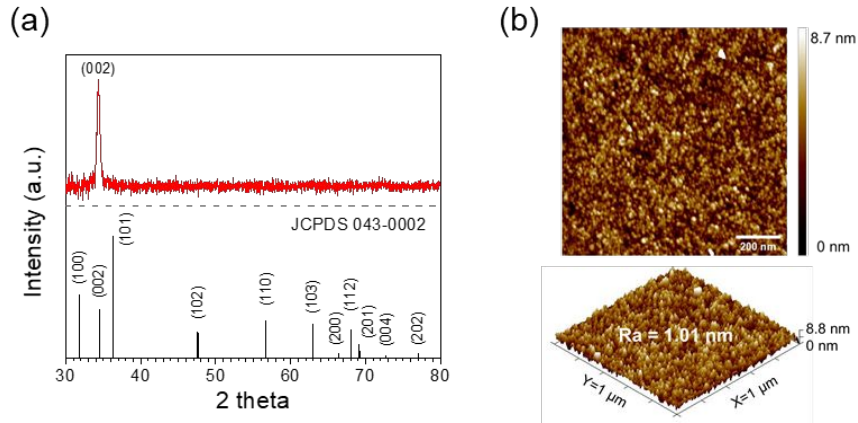

**Figure S 3** (a) Texture of ZnO sputtered film revealed by XRD. (b) Surface morphology and roughness of ZnO sputtered film revealed by AFM.

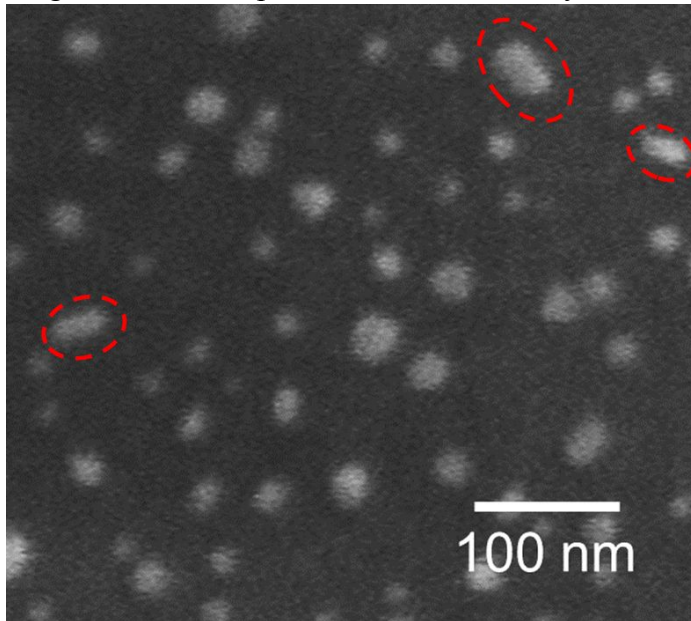

**Figure S 4** SEM image of Au@ZnO\_SF annealed at 400 °C for 100 h. Binary collisions and fusions of Au NPs as large as 20 nm are marked in red.

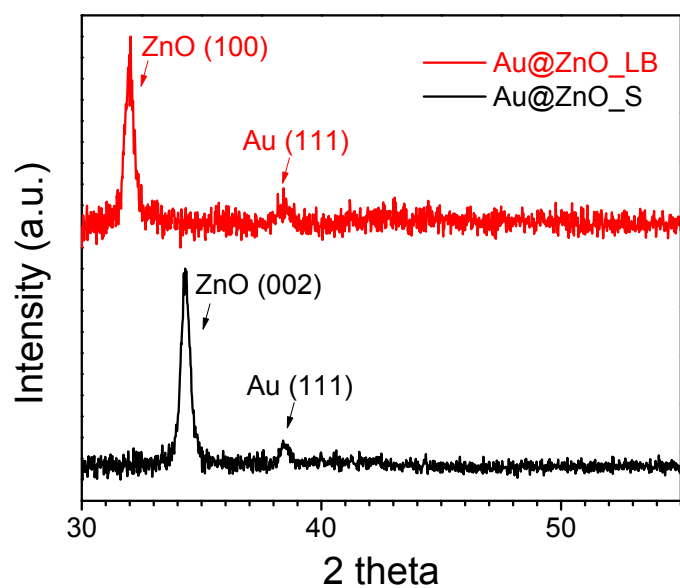

**Figure S 5** XRD patterns of Au doped ZnO film after annealing at 400 °C for 24 h.

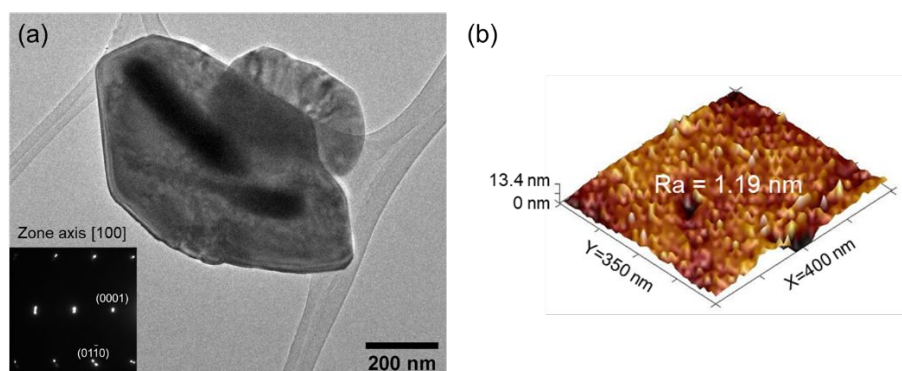

**Figure S 6** (a) TEM of ZnO nanoplate with (100) as primary crystal facet. (b) Surface roughness of ZnO nanoplate.

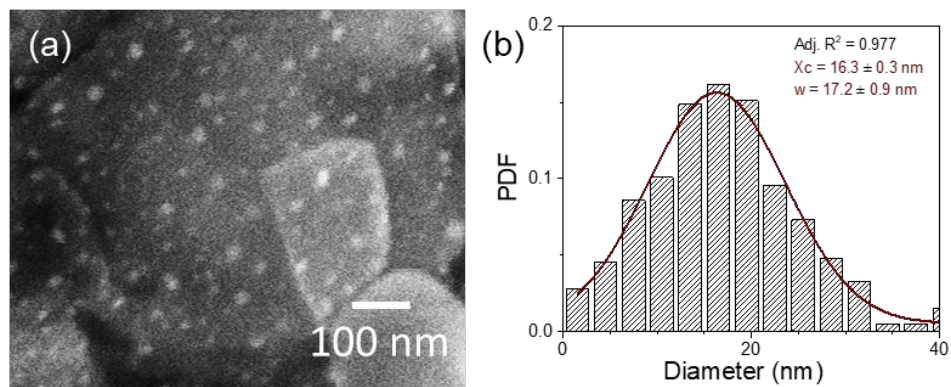

**Figure S 7** (a) SEM of Au@ZnO\_NP annealed at 400 °C for 24 h. (b) Particle size distribution.

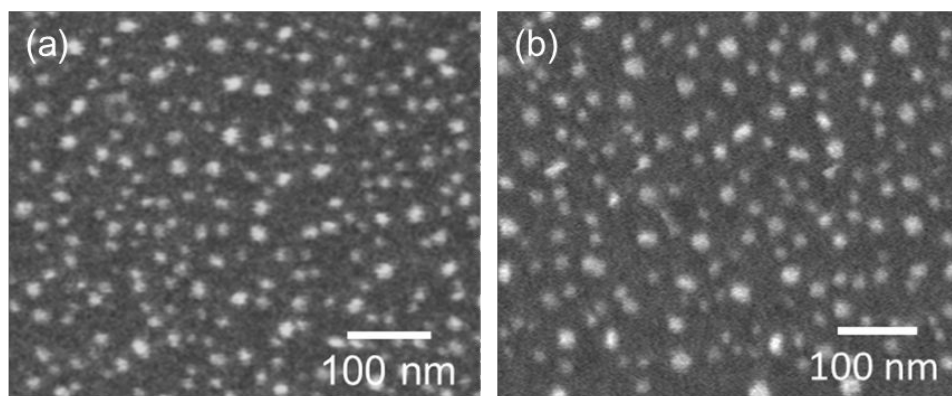

**Figure S 8** SEM images of Au@ZnO\_SF before (a) and after (b) the stability test.

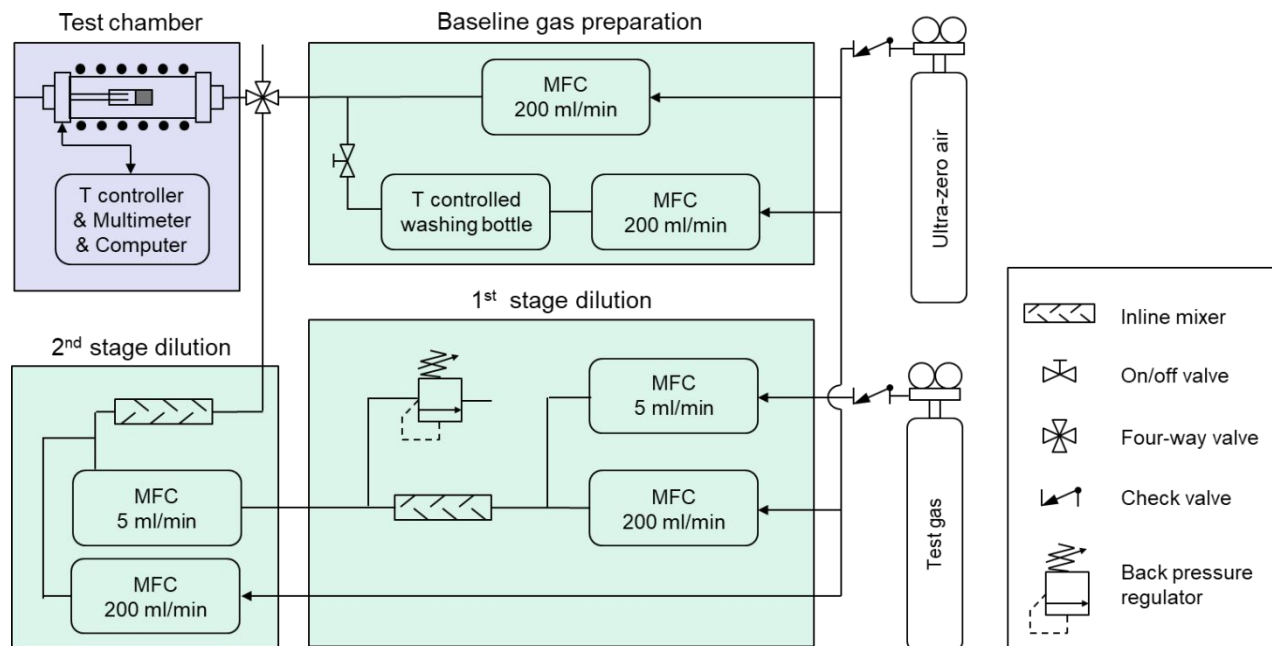

**Figure S 9** Schematic of gas sensor testing system used in this work.
